# Supplementary material for: Organic removal assessment at full-scale treatment facilities using advanced organic characterization tools
Source: Royal Society of Chemistry journal article supplement (doi:10.1039/c4em00227j), 2014-06-20
Supplement: c4em00227j1.pdf [file c4em00227j1.pdf]

## Supporting Information

S-Table 1 Regular water quality parameters

S-Figure 1 Map of sampling locations of drinking water in China

S-Figure 2 Molecular weight distributions by high performance size-exclusion chromatography (HPSEC). (A-a) Yellow river in northwest of China, (A-b) Yellow river in north of China; (B-a) Pearl river in southwest of China, (B-b) Pearl river in south of China; (C-a) Yangtze river in southwest of China, (C-b) Yangtze river in central China and (C-c) Yangtze river in east of China; (D-a) Coastal areas in South China, (D-b) Coastal areas in east of China and (D-c) Coastal areas in north of China

S-Figure 3 Illustration of peak fitting a HPSEC AMW distribution profile

S-Figure 4 Correlation of FA with DOC in source water

S-Figure 5 Correlation of  $UV_{254}$  with different Mw fractions: (a) source water and (b) treated water

S-Table 1 Regular water quality parameters

| sample | turbidity (NUT ) | pH   | Water source            | type of sedimentation tank | coagulant        |
|--------|------------------|------|-------------------------|----------------------------|------------------|
| YR1    | 115              | 7.98 | water supply reservoirs | horizontal flow            | PAFC             |
| YR2    | 131              | 8.03 | water supply reservoirs | horizontal flow            | PAFC+PPF         |
| YR3    | 308              | 8.10 | river                   | horizontal flow            | HCA,PAC,PAF<br>C |
| YR4    | 0.780            | 7.78 | Underground water       | horizontal flow            | PAC              |
| YR5    | 1.950            | 7.54 | Underground water       | horizontal flow            | PAC              |
| YR6    | 8.380            | 7.45 | Underground water       | horizontal flow            | PAC              |
| YR7    | 2.910            | 8.05 | River                   | horizontal flow            | PAC              |
| YR8    | 1.060            | 7.84 | Underground water       | horizontal flow            | PAC              |
| YR9    | 0.607            | 7.78 | Underground water       | horizontal flow            | PAC              |
| YR10   | 1.550            | 8.17 | Surface water           | inclined-plate             | PAC              |
| YR11   | 2.560            | 8.12 | Surface water           | horizontal flow            | PAC              |
| YR12   | 2.450            | 8.20 | Surface water           | horizontal flow            | PAFC             |
| YR13   | 1.030            | 7.47 | Underground water       | horizontal flow            | PAC              |
| YA1    | 31.90            | 7.93 | Surface water           | horizontal flow            | PAC              |
| YA2    | 935.0            | 7.97 | River                   | horizontal flow            | PAC              |
| YA3    | 629.0            | 8.07 | river                   | inclined-tube              | PAC              |
| YA4    | 3.690            | 7.88 | water supply reservoirs | horizontal flow            | PAC              |
| YA5    | 0.597            | 8.05 | Underground water       | inclined-tube              | PAC              |
| YA6    | 6.830            | 7.92 | water supply reservoirs | horizontal flow            | PAC              |
| YA7    | 1.740            | 8.09 | water supply reservoirs | inclined-tube              | PAC              |
| YA8    | 5.280            | 7.63 | water supply reservoirs | inclined-plate             | PAC              |
| YA9    | 3.080            | 7.35 | water supply reservoirs | horizontal flow            | PAC              |
| YA10   | 34.10            | 7.68 | River                   | horizontal flow            | PAC              |
| YA11   | 37.00            | 8.07 | River                   | horizontal flow            | PAFC             |
| YA12   | 214.0            | 7.91 | river                   | horizontal flow            | PAC              |
| YA13   | 60.30            | 8.23 | River                   | horizontal flow            | PAC              |
| YA14   | 148.0            | 7.84 | River                   | horizontal flow            | PAC              |
| YA15   | 47.60            | 7.88 | river                   | horizontal flow            | PAC              |
| PR1    | 5.09             | 7.79 | water supply reservoirs | horizontal flow            | PAFC             |
| PR2    | 2.76             | 8.01 | water supply reservoirs | Flotation                  | PAC              |
| PR3    | 92               | 7.61 | Surface water           | horizontal flow            | PAC              |
| PR4    | 113              | 7.88 | Surface water           | horizontal flow            | PAC              |
| PR5    | 10.5             | 7.47 | Surface water           | horizontal flow            | PAC              |
| PR6    | 10.8             | 7.48 | Surface water           | horizontal flow            | PAC              |
| PR7    | 35.3             | 6.90 | Surface water           | horizontal flow            | PAC              |
| CA1    | 55.8             | 7.00 | Surface water           | horizontal flow            | PAC              |
| CA2    | 7.29             | 6.80 | Surface water           | Flotation                  | PAC              |
| CA3    | 12.7             | 6.71 | Surface water           | horizontal flow            | PAC              |
| CA4    | 11.3             | 6.39 | Surface water           | horizontal flow            | PAC              |
| CA5    | 16.3             | 6.63 | Surface water           | horizontal flow            | PAC              |

|      |       |      |                         |                 |      |
|------|-------|------|-------------------------|-----------------|------|
| CA6  | 12.5  | 6.59 | Surface water           | horizontal flow | PAC  |
| CA7  | 1.970 | 7.82 | Surface water           | horizontal flow | PAFC |
| CA8  | 7.160 | 7.22 | Surface water           | horizontal flow | PAFC |
| CA9  | 11.10 | 7.12 | water supply reservoirs | horizontal flow | PAC  |
| CA10 | 49.20 | 7.02 | Surface water           | horizontal flow | PAC  |
| CA11 | 1.970 | 7.31 | water supply reservoirs | horizontal flow | PAC  |
| CA12 | 20.80 | 7.62 | river                   | horizontal flow | PAC  |
| CA13 | 33.20 | 7.86 | river                   | horizontal flow | PAC  |
| CA14 | 55.20 | 7.82 | River                   | horizontal flow | PAC  |
| CA15 | 3.690 | 8.00 | Surface water           | horizontal flow | PAC  |
| CA16 | 3.230 | 8.02 | Surface water           | horizontal flow | PAC  |
| CA17 | 9.870 | 7.92 | Surface water           | horizontal flow | PAC  |

---

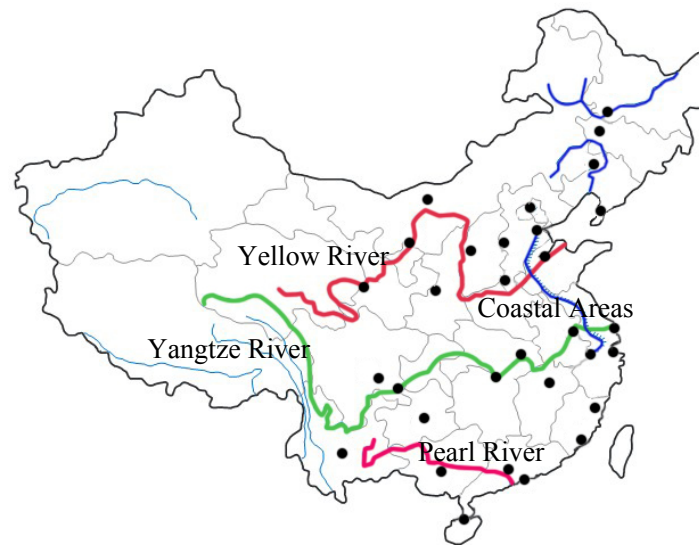

S-Figure 1 Map of sampling locations of drinking water in China

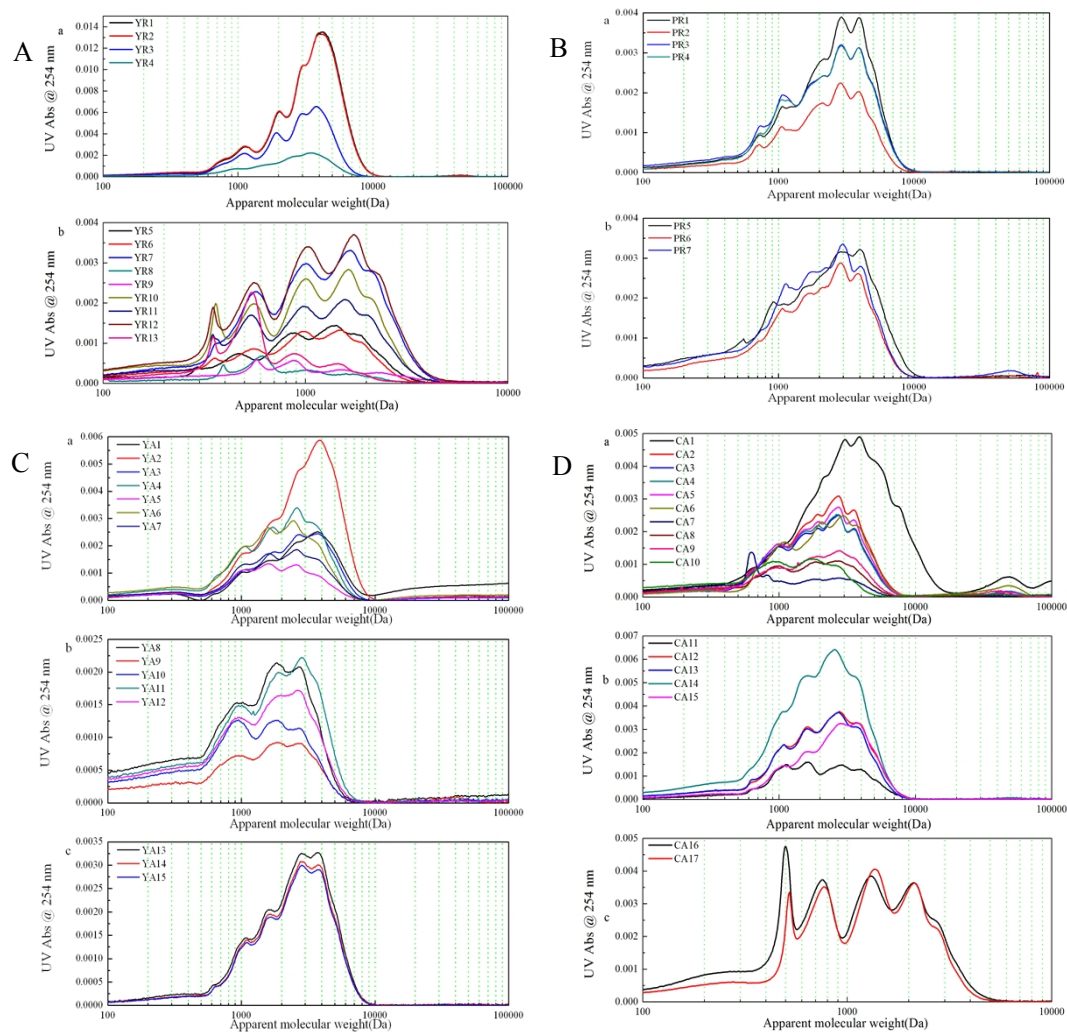

S-Figure 2 Molecular weight distributions by high performance size-exclusion chromatography (HPSEC). (A-a) Yellow river in northwest of China, (A-b) Yellow river in north of China; (B-a) Pearl river in southwest of China, (B-b) Pearl river in south of China; (C-a) Yangtze river in southwest of China, (C-b) Yangtze river in central China and (C-c) Yangtze river in east of China; (D-a) Coastal areas in South China, (D-b) Coastal areas in east of China and (D-c) Coastal areas in north of China

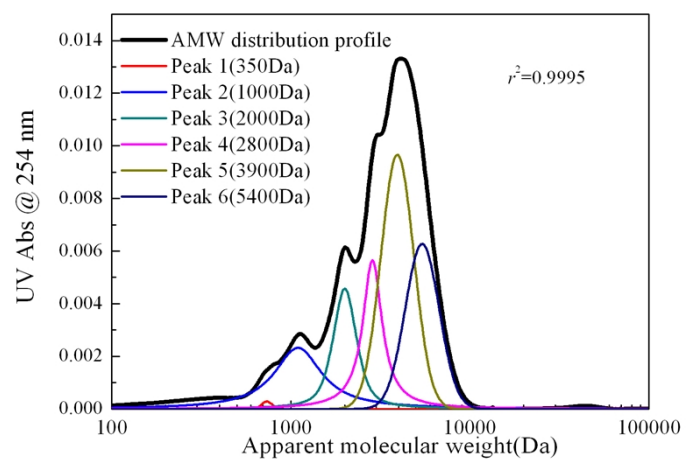

S-Figure 3 Illustration of peak fitting a HPSEC AMW distribution profile.

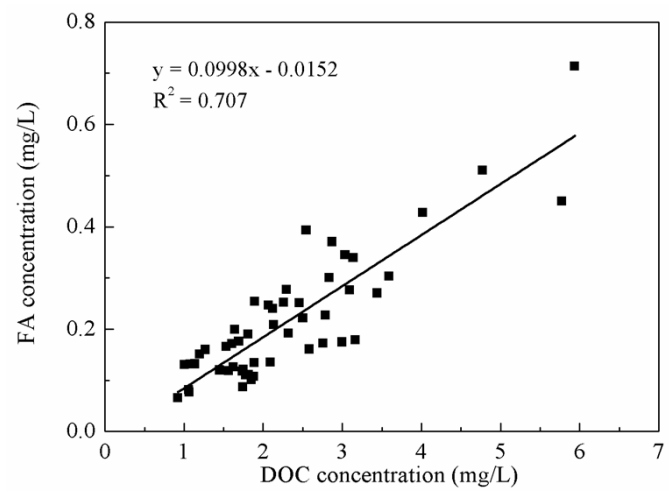

S-Figure 4 Correlation of FA with DOC in source water

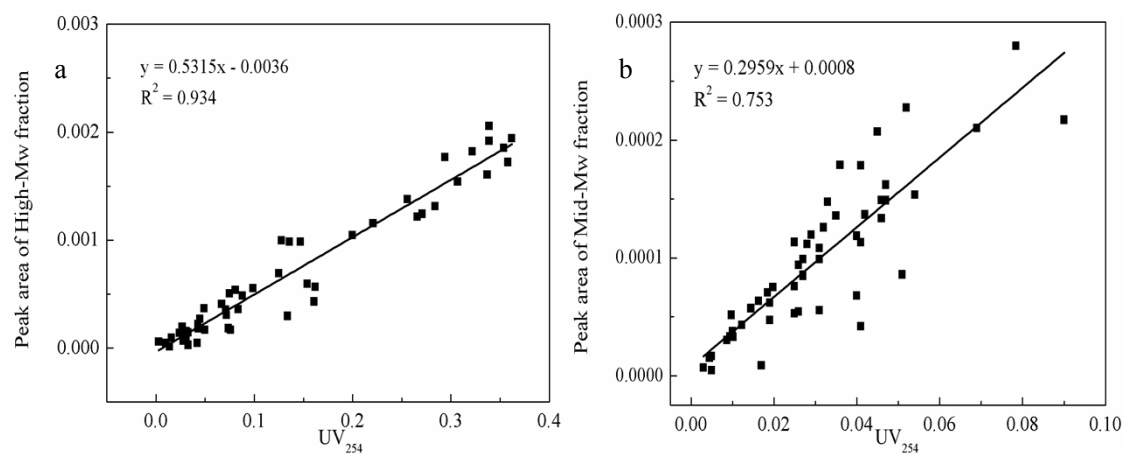

S-Figure 5 Correlation of UV<sub>254</sub> with different Mw fractions: (a) source water and (b) treated water
